# Supplementary material for: Phosphoproteomics reveals extensive in vivo phosphorylation of Arabidopsis proteins involved in RNA metabolism
Source: PubMed Central journal article supplement — Nucleic Acids Res. 2006 Jul 17;34(11):3267–78. doi: 10.1093/nar/gkl429 (PMC1904105; doi:10.1093/nar/gkl429), 2006-07-17
Supplement: nar_34_11_3267__1.pdf [file nar_34_11_3267__1.pdf]

---

**Supplemental Table 1. Overview phosphorylation sites of RNA metabolism proteins**

---

|                       | Nuclear | Cytosolic | Total <sup>1</sup> |
|-----------------------|---------|-----------|--------------------|
| Proteins              | 14      | 18        | 22                 |
| Sites                 | 52      | 51        | 79                 |
| Phosphopeptides       | 29      | 35        | 52                 |
| Singly-phosphorylated | 4       | 19        | 20                 |
| Doubly-phosphorylated | 22      | 13        | 27                 |
| Triply-phosphorylated | 3       | 3         | 5                  |

---

<sup>1</sup>non-redundant

---
