# Supplementary material for: Phosphoproteomics reveals extensive in vivo phosphorylation of Arabidopsis proteins involved in RNA metabolism
Source: PubMed Central journal article supplement — Nucleic Acids Res. 2006 Jul 17;34(11):3267–78. doi: 10.1093/nar/gkl429 (PMC1904105; doi:10.1093/nar/gkl429), 2006-07-17
Supplement: nar_34_11_3267__2.pdf [file nar_34_11_3267__2.pdf]

**Supplemental Table 2. Phosphorylation of Arabidopsis RNA metabolism-related proteins**

|                  |                                               |                                                                                    |
|------------------|-----------------------------------------------|------------------------------------------------------------------------------------|
| <p>At1g04080</p> | <p>Similar to yeast Prp39 splicing factor</p> |  |
| <p>At4g17720</p> | <p>RRM-containing protein</p>                 |   |
| <p>At5g04430</p> | <p>NOVA-like RNA-binding protein</p>          |   |
| <p>At5g51300</p> | <p>SF1 splicing factor-related</p>            |  |

Phosphorylation sites are indicated by red arrows. Pink regions indicate areas of low compositional complexity. HAT, half-a-tetratricopeptide repeat; RRM, RNA recognition motif; KH, K homology RNA-binding domain; ZnF\_C2HC, zinc finger. Protein structures are generated using the SMART database (<http://smart.embl-heidelberg.de/>).
